# Supplementary material for: Liposome-encapsulated lambda exonuclease-based amplification system for enhanced detection of miRNA in platelet-derived microvesicles of non-small cell lung cancer
Source: Royal Society of Chemistry journal article supplement (doi:10.1039/d4tb02621g), 2025-01-01
Supplement: d4tb02621g1.pdf [file d4tb02621g1.pdf]

# **Supplementary Data**

# **Liposome-encapsulated lambda exonuclease-based amplification system for enhanced detection of miRNA in platelet-derived microvesicles of non-small cell lung cancer**

Mohamed Aimene Benariba<sup>a,b,1</sup>, Kanza Hannachi<sup>c,1</sup>, Sanxia Wang<sup>a</sup>, Yuting Zhang<sup>a</sup>, Xiaoli Wang<sup>a</sup>, Li Wang<sup>\*,c</sup>, Nandi Zhou<sup>a,\*</sup>

<sup>a</sup> School of Biotechnology and Key Laboratory of Carbohydrate Chemistry and Biotechnology of Ministry of Education, Jiangnan University, Wuxi 214122, China

<sup>b</sup> Bioengineering Laboratory, Ecole Nationale Supérieure de Biotechnologie, Ville Universitaire Ali Mendjeli, BP E66 25100, Constantine, Algeria

<sup>c</sup> State Key Laboratory of Food Science and Technology, School of Food Science and Technology, National Engineering Research Center for Functional Food, Jiangnan University, Wuxi 214122, China

<sup>1</sup> These authors contributed equally to this work

\* Corresponding author. E-mail: wl0519@163.com (L. Wang), zhounandi@jiangnan.edu.cn (N. Zhou)

## Chemicals and reagents

1,2-distearoyl-sn-glycero-3-phosphocholine (DPPC), PEGylated 1,2-dipalmitoyl-rac-glycero-3-phosphoethanolamine-Biotin [DPPE-PEG (2000)-Biotin], cholesterol, bovine serum albumin (BSA) and streptavidin protein were purchased from Sigma-Aldrich Ltd (Shanghai, China). Lambda exonuclease enzyme ( $\lambda$  EXO) and lambda exonuclease buffer were purchased from the New England Biolabs Ltd (Beijing, China). DiD (1,10-Dioctadecyl-3,3,30,30-Tetramethylindodicarbocyanine,4-Chlorobenzenesulfonate Salt), DiI (1,10-dioctadecyl-3,3,30,30-tetramethylindocarbocyanine perchlorate), DIO (3,30-dioctadecyloxacarbocyanine perchlorate) and biotinylated CD41a antibody were obtained from Beyotime Biotech Inc (Shanghai, China). The CD41a antibody labeled with FITC was sourced from Biolegend (Beijing, China). Additionally, the SanPrep Column MicroRNA Mini-Prep Kit, MicroRNA First Strand cDNA Synthesis Kit, and MicroRNA qPCR Kit (SYBR Green Method) were acquired from Sangon Biotech (Shanghai, China). All other chemicals utilized in the experiment were analytical grade and were used without further purification. Throughout the experimental procedures, ultrapure water with a resistivity of 18.2 M $\Omega$  cm, obtained from the microporous filtration system (Billerica, USA), was employed for the preparation of solutions.

The oligonucleotide sequences were synthesized and HPLC-purified by Sangon Biotech Co., Ltd (Shanghai, China), which is listed in **Table S1**.

**Table S1** Oligonucleotide sequences.

| Name           | Sequence (5'→3')        | F-Primer                       |
|----------------|-------------------------|--------------------------------|
| miRNA-12<br>46 | AAUGGAUUUUUGGAGCAGG     | CGCAATGGATTTTTGGAGCAGG         |
| miRNA-21       | UAGCUUAUCAGACUGAUGUUGA  | CGGTAGCTTATCAGACTGATGTT<br>GA  |
| miRNA-22<br>3  | UGUCAGUUUGUCAAAUACCCCA  | CGCTGTCAGTTTGTCAAATACCC<br>CA  |
| miRNA-14<br>1  | UACACUGUCUGGUAAAGAUGG   | CGCCTAACACTGTCTGGTAAAG<br>ATGG |
|                | <b>P-</b>               |                                |
| P1             | TCAACATCAGTCTGATAAGCTAG | /                              |
|                | <b>AAC- BHQ1</b>        |                                |
|                | <b>FAM-</b>             | /                              |
| P2             | GTTCTAGGTGTACCAGACTGATG | /                              |

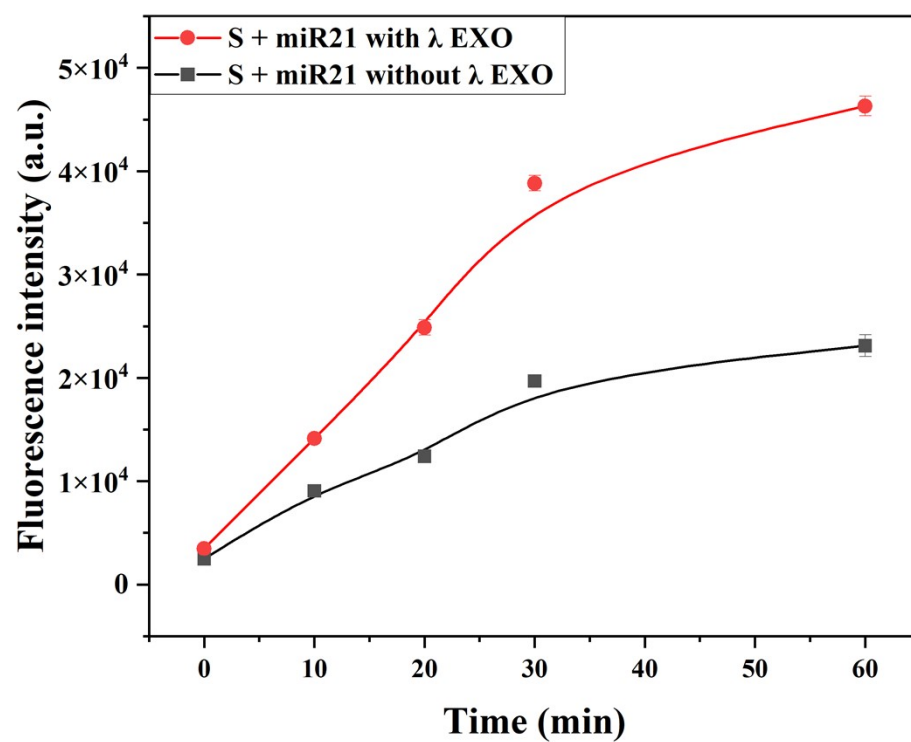

**Fig. S1** Time-dependent fluorescence intensity of the amplification system in the presence (red line) and absence (black line) of  $\lambda$  EXO. The data are shown as the mean  $\pm$  SD ( $n \geq 3$ ).

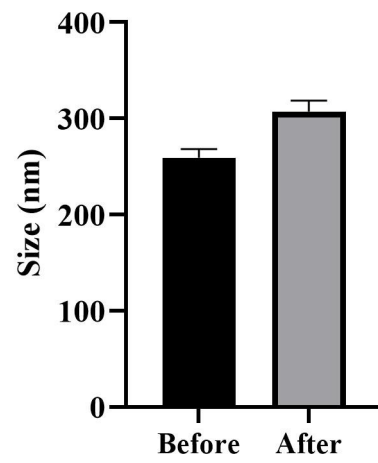

**Fig. S2** Comparison of the liposome size before and after conjugation with CD41 antibody. The data are shown as the mean  $\pm$  SD ( $n \geq 3$ ).
